# Supplementary material for: Biochemical composition and function of subalpine shrubland and meadow soil microbiomes in the Qilian Mountains, Qinghai–Tibetan plateau, China
Source: PeerJ. 2022 Apr 4;10:e13188. doi: 10.7717/peerj.13188 (PMC8988934; doi:10.7717/peerj.13188)
Supplement: Supplemental Information 1 [file peerj-10-13188-s001.xlsx]

## Sheet: sheet 1
sample	pH	WHC	SOC	AOC	DOC	TN	DTN	C/N	AP	AK
MEA1	6.93	51.34	42.0245	5.54939	477.5	4.4	24.55	5.4	63.5217	100
MEA2	6.8	54.33	38.6931	1.27079	490.6	4.6	20.85	8.41154	68.7603	112.075
MEA3	6.55	54.24	33.0166	3.44	492	4.5	25.44	5.5	49.9596	113.208
MEA4	6.77	52.68	36.1307	4.15	497.8	4.79	22.43	7.54295	62.3575	113.208
MEA5	6.87	57.63	34.6202	5.21	444.8	5	24.78	6	53.5975	103.774
POT1	6.85	64.65	50.01	7.21789	658	7.98	29.05	8.98	50.0304	200
POT2	6.8	67.45	46.0267	5.41655	643	8.7	32.45	9.7	50.6049	190.811
POT3	6.55	62.73	50.47	5.9329	677.175	8.35	26.3	6.04431	66.3273	200
POT4	6.77	64.89	42.9633	4.35	645.67	8.03	30.76	9.03	57.1189	182.692
POT5	6.76	65.77	48.6747	6.14	688.45	8.55	29.75	9.55	63.3121	190.615
RHO1	7.18	79.64	88.9452	7.11789	769.5	12.69	43.65	13.69	62.9396	200
RHO2	7	84.01	95.7342	8.31655	750	13.05	35.525	7.33595	67.0141	210
RHO3	6.97	80.54	93.41	7.6329	786.89	13.31	33.2	7.01803	67.5962	210
RHO4	6.89	83.9	95.9695	8.45	765.9	12.43	40.06	13.43	67.5962	220
RHO5	6.89	81.43	90.7356	8.04	765.34	13.5	35.76	14.5	59.3143	200
