# Supplementary material for: Biochemical composition and function of subalpine shrubland and meadow soil microbiomes in the Qilian Mountains, Qinghai–Tibetan plateau, China
Source: PeerJ. 2022 Apr 4;10:e13188. doi: 10.7717/peerj.13188 (PMC8988934; doi:10.7717/peerj.13188)
Supplement: Supplemental Information 2 [file peerj-10-13188-s002.xlsx]

## Sheet: Sheet1
sample	totPLFAs (nmol/g)	BAC (nmol/g)	GP (nmol/g)	GN (nmol/g)	FUN (nmol/g)	ACT (nmol/g)	AMF (nmol/g)	F:B	GP:GN	BGL (μg/g·h)	CBH (μg/g·h)	NAG (μg/g·h)	LAP (μg/g·h)	ALP (μg/g·h)
MEA1	38.5436	24.3106	7.26364	9.242	1.57556	2.01304	1.60321	0.0648094	0.785939	84.9454	19.5135	16.5799	81.4908	647.292
MEA2	35.0494	25.6591	6.99893	9.34659	1.44065	2.62556	1.38301	0.056146	0.748822	70.1268	17.0275	12.3078	78.7284	566.39
MEA3	37.5212	22.1009	5.70937	7.84773	1.39141	2.41616	1.47935	0.0629572	0.727518	75.3333	21.14	20.5849	81.4908	314.072
MEA4	41.9646	26.2556	7.44809	9.12081	1.37705	2.30045	1.7123	0.0524477	0.816604	62.6499	23.2425	25.124	75.966	779.458
MEA5	39.9428	24.0764	5.70925	8.06026	1.78529	2.33984	1.5531	0.0741512	0.708321	63.7448	23.2425	20.8519	34.53	485.488
POT1	44.2957	30.0685	8.53428	11.2036	3.26479	2.28708	1.26867	0.108578	0.761742	99.2255	34.6472	28.2923	105.006	632.274
POT2	46.4172	31.9514	8.46538	12.2897	3.06051	2.38365	1.45669	0.0957863	0.688817	105.942	36.6062	31.3707	133.637	493.746
POT3	48.3688	29.6811	8.51223	12.4465	3.21862	2.24498	1.33724	0.10844	0.683904	174.893	24.0945	74.4684	115.61	777.519
POT4	46.7604	31.5743	8.58335	11.613	3.18473	2.71045	1.44589	0.100865	0.739114	98.4795	38.3671	35.0089	169.691	1045.76
POT5	48.5621	30.0774	8.3609	10.9307	3.21382	1.91546	1.31099	0.106852	0.7649	163.966	21.5758	35.8484	120.117	500.462
RHO1	55.1	45.9358	11.1231	15.2166	4.25605	4.64109	1.92516	0.0926523	0.730984	255.079	53.213	84.771	165.622	1365.55
RHO2	55.4	46.5241	11.427	16.0862	4.12843	4.35996	2.00625	0.0887375	0.71036	251.35	36.6051	26.9715	148.961	640.264
RHO3	56.4	44.3387	11.4725	16.6299	4.07182	4.0387	2.00957	0.0918346	0.68987	170.827	43.307	108.388	308.166	1415.9
RHO4	54	44.4803	10.3886	14.5793	3.95458	3.95149	1.94881	0.0889064	0.712561	124.36	33.4011	85.3925	218.073	1399.11
RHO5	54.9	46.2173	10.1452	14.4207	4.01466	4.39042	1.83324	0.0868649	0.703515	161.65	45.443	69.2335	160.685	1438.27
